# Supplementary material for: Development of an anti-pollution coating process technology for the application of an on-site PV module
Source: publisher site journal article supplement (doi:10.3762/bjnano.10.32), 2019-02-01
Supplement: Additional file 1 [file 2190-4286-10-32-S1.pdf]

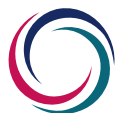

## Supporting Information

for

### **Development of an anti-pollution coating process technology for the application of an on-site PV module**

Sejin Jung, Wonseok Choi, Jung Hyun Kim and Jang Myoun Ko

*Beilstein J. Nanotechnol.* **2019**, *10*, 332–336. [doi:10.3762/bjnano.10.32](https://doi.org/10.3762/bjnano.10.32)

## Overview

# Development of Anti-pollution Coating Process Technology for the Application of Onsite PV Module

## Experiment

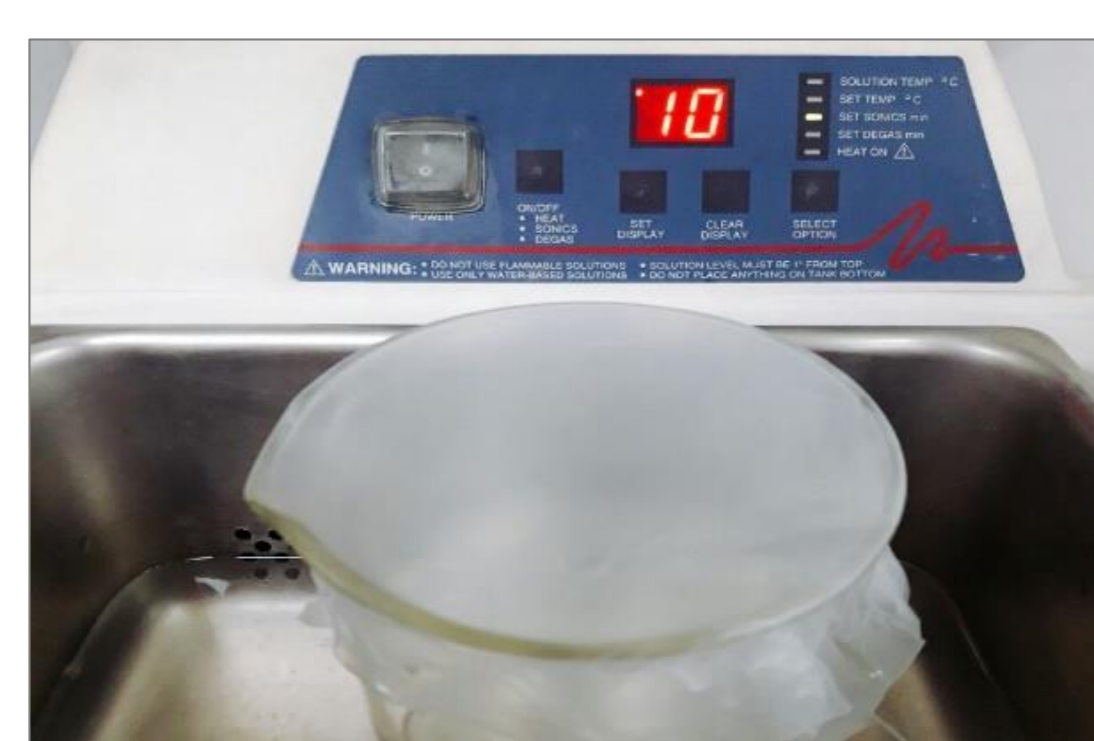

Cleaning Glass

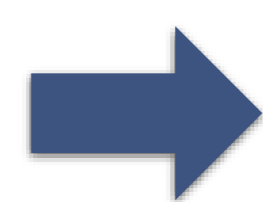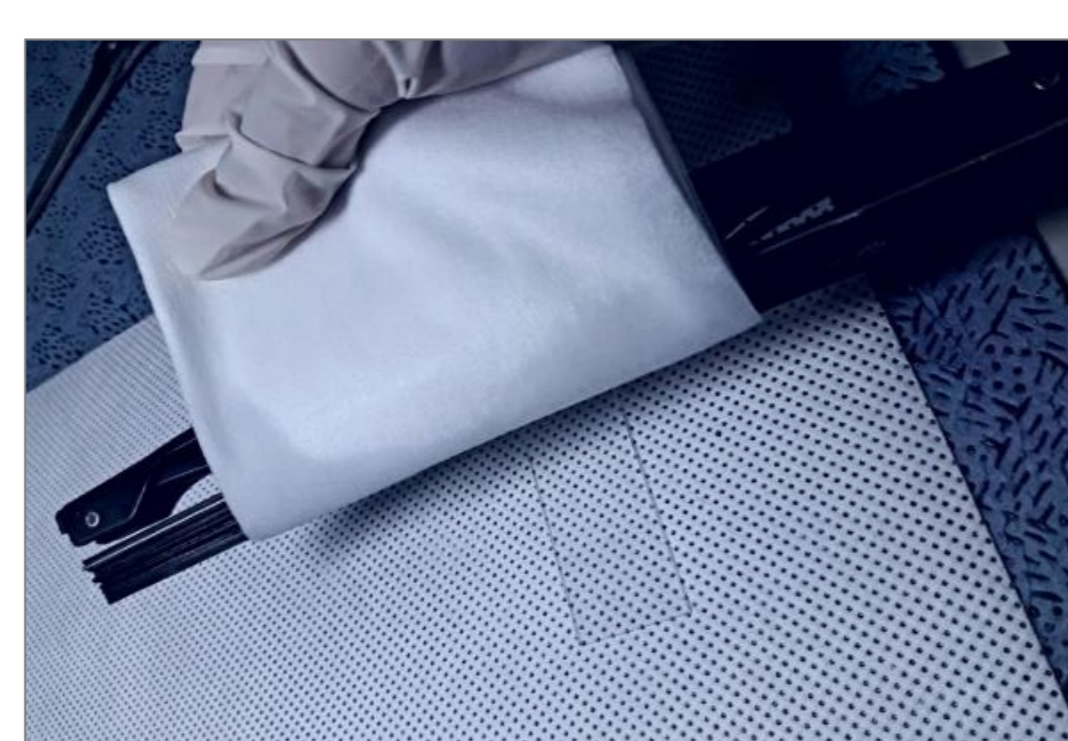

Brush Coating on Glass

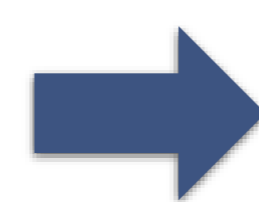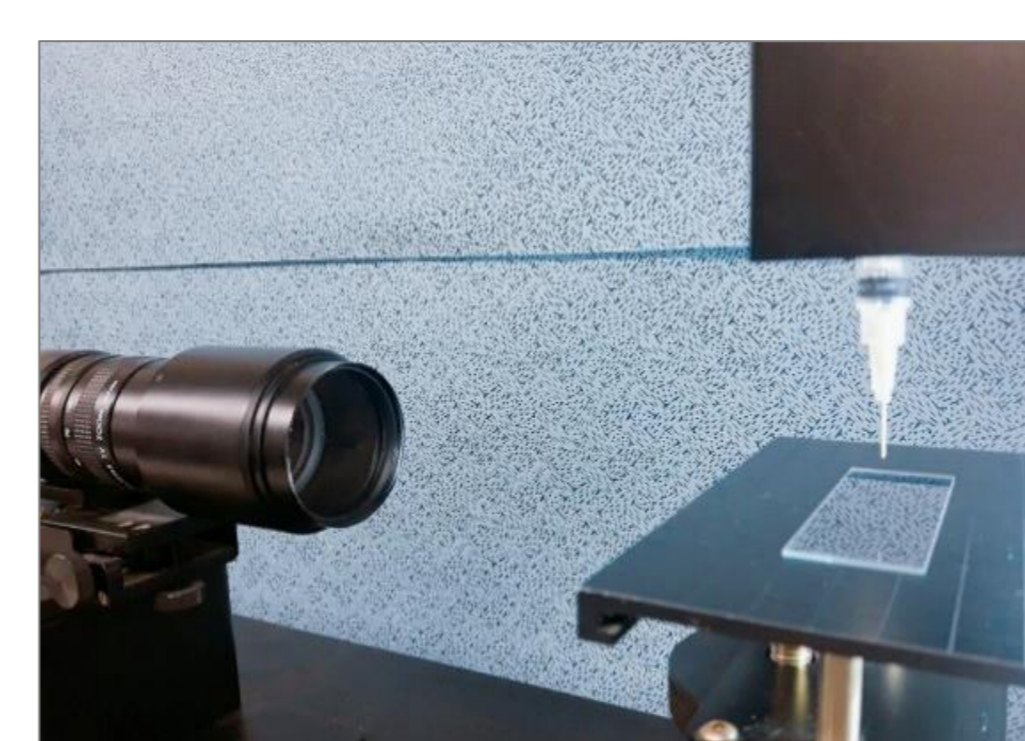

Properties analysis

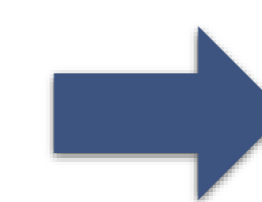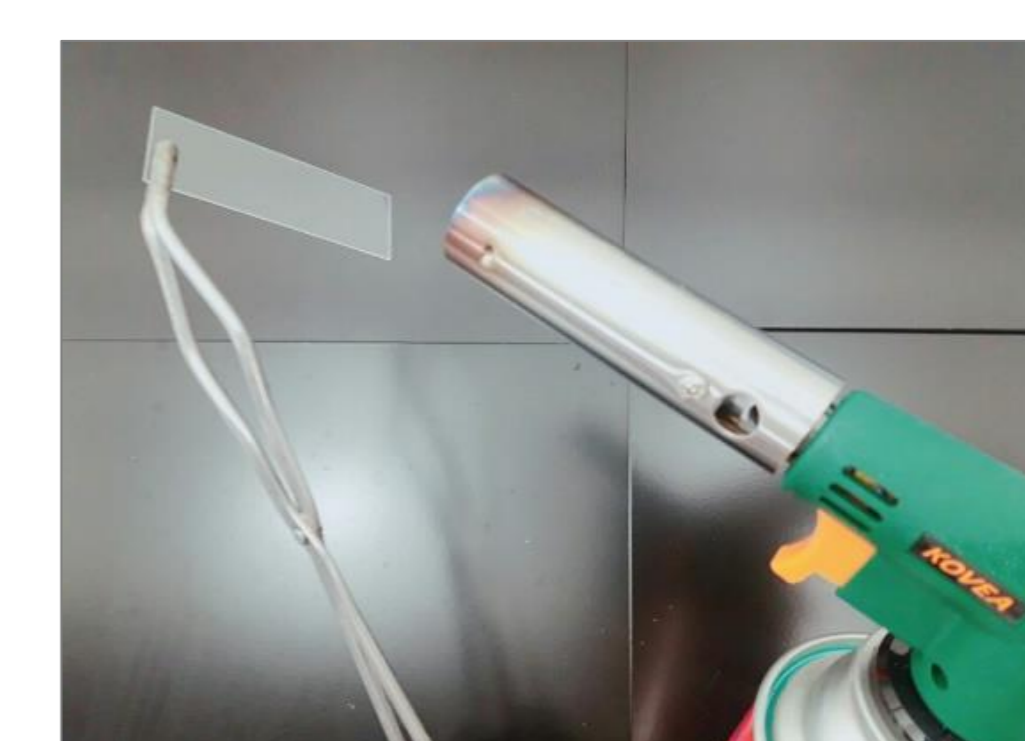

Annealing

| Condition | Number of annealing treatment |              |              |              |              |              |              |              |              |              |              |              |
|-----------|-------------------------------|--------------|--------------|--------------|--------------|--------------|--------------|--------------|--------------|--------------|--------------|--------------|
|           | once                          |              | twice        |              |              |              | third times  |              |              |              |              |              |
|           | Heating time                  | Cooling time | Heating time | Cooling time | Heating time | Cooling time | Heating time | Cooling time | Heating time | Cooling time | Heating time | Cooling time |
| Anneal 1  | 2min                          | 10min        | 2min         | 10min        | 2min         | 10min        | 2min         | 10min        | 2min         | 10min        | 2min         | 10min        |
| Anneal 2  | 2min                          | 10min        | 2min         | 10min        | 2min         | 10min        | 2min         | 10min        | 2min         | 10min        | 2min         | 10min        |
| Anneal 3  | 2min                          | 10min        | 2min         | 10min        | 2min         | 10min        | 2min         | 10min        | 2min         | 10min        | 2min         | 10min        |

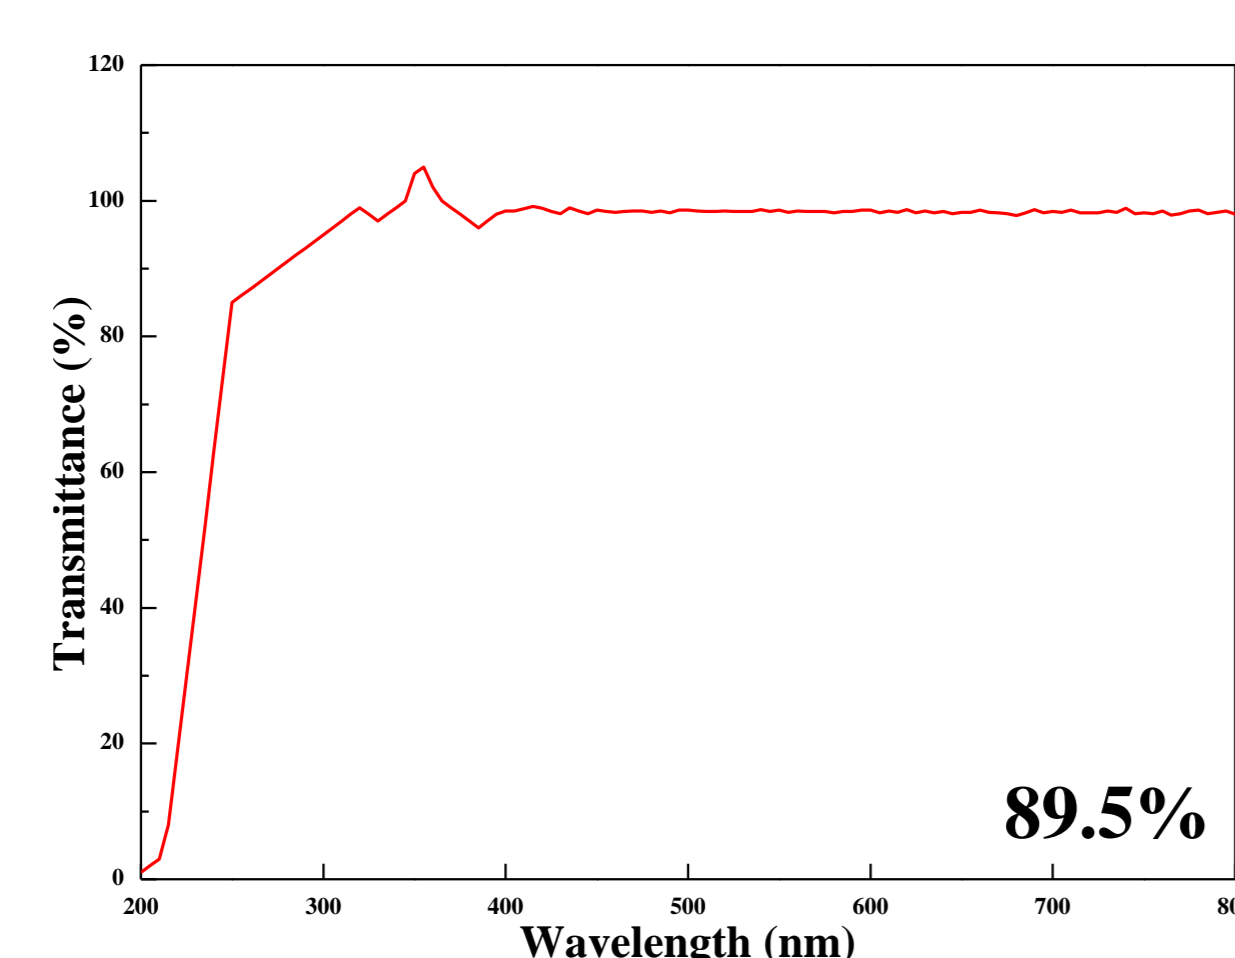

Room temperature

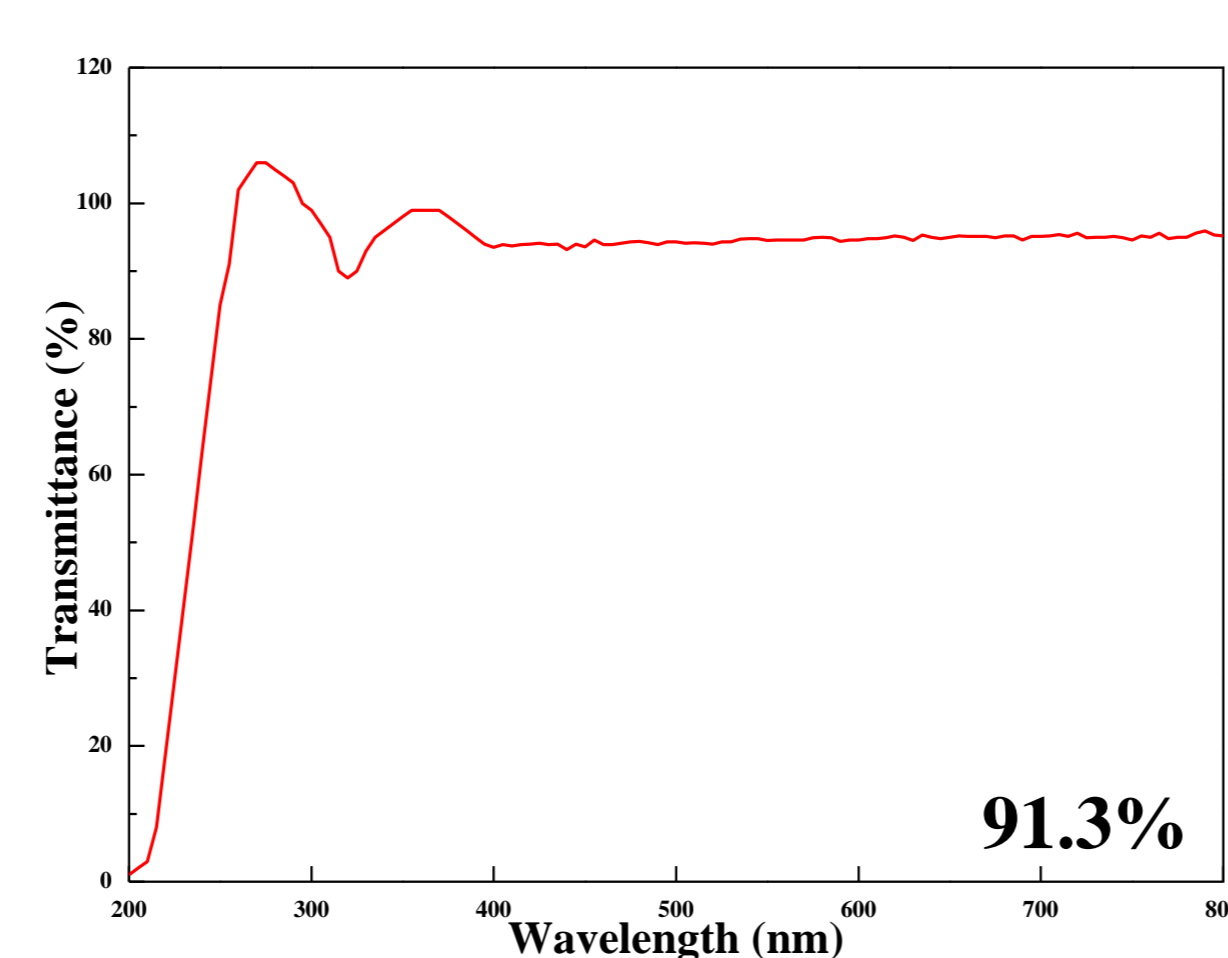

Anneal 1

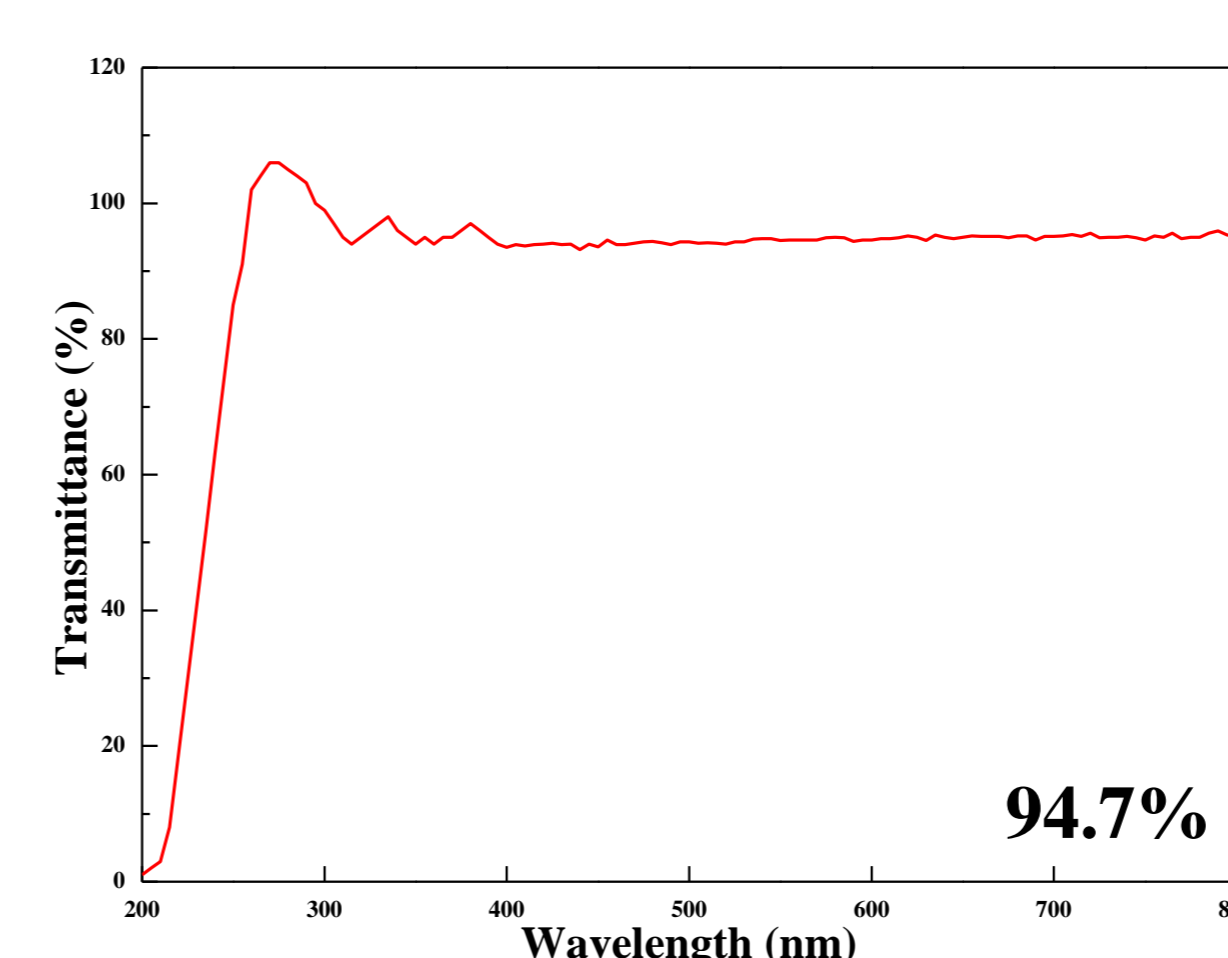

Anneal 2

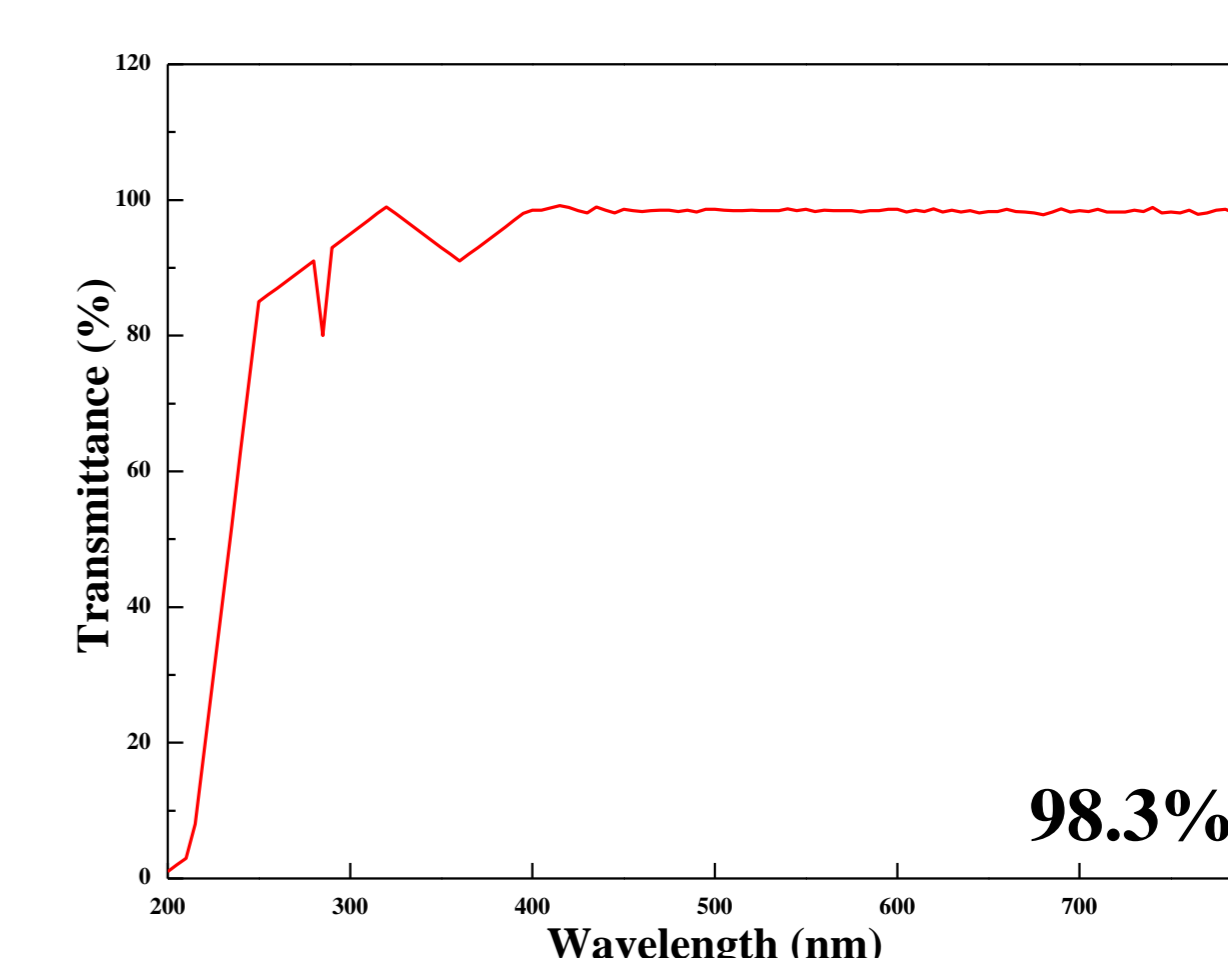

Anneal 3

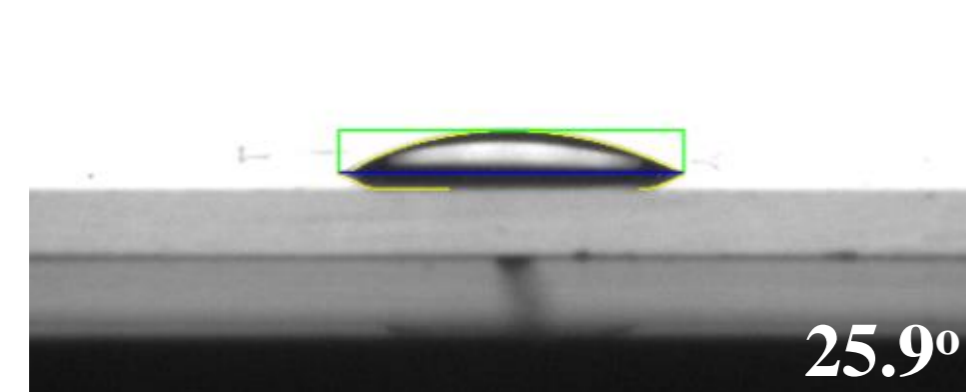

Room temperature

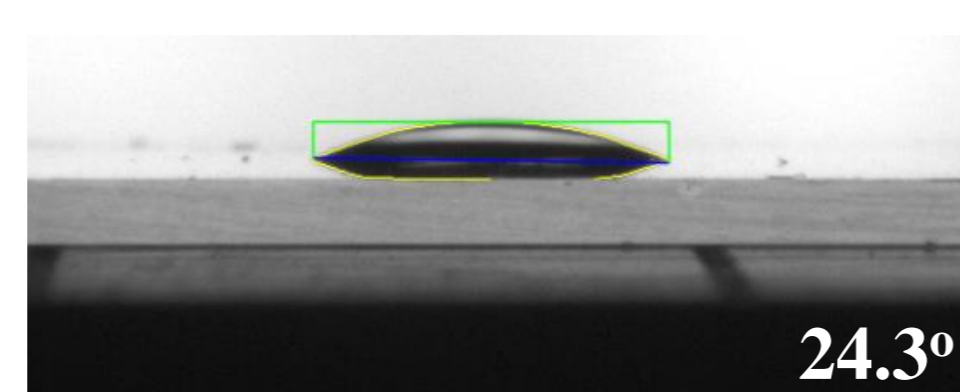

Anneal 1

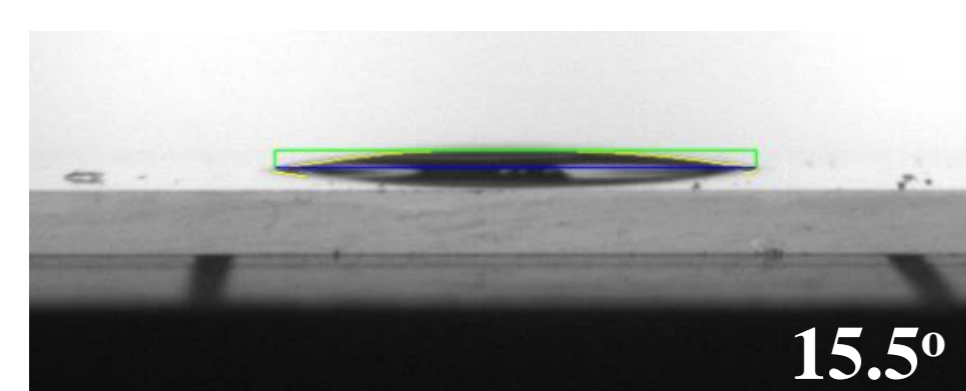

Anneal 2

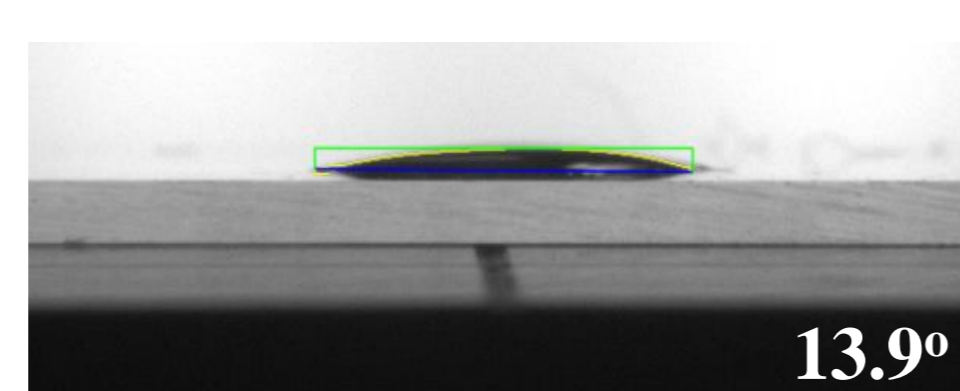

Anneal 3

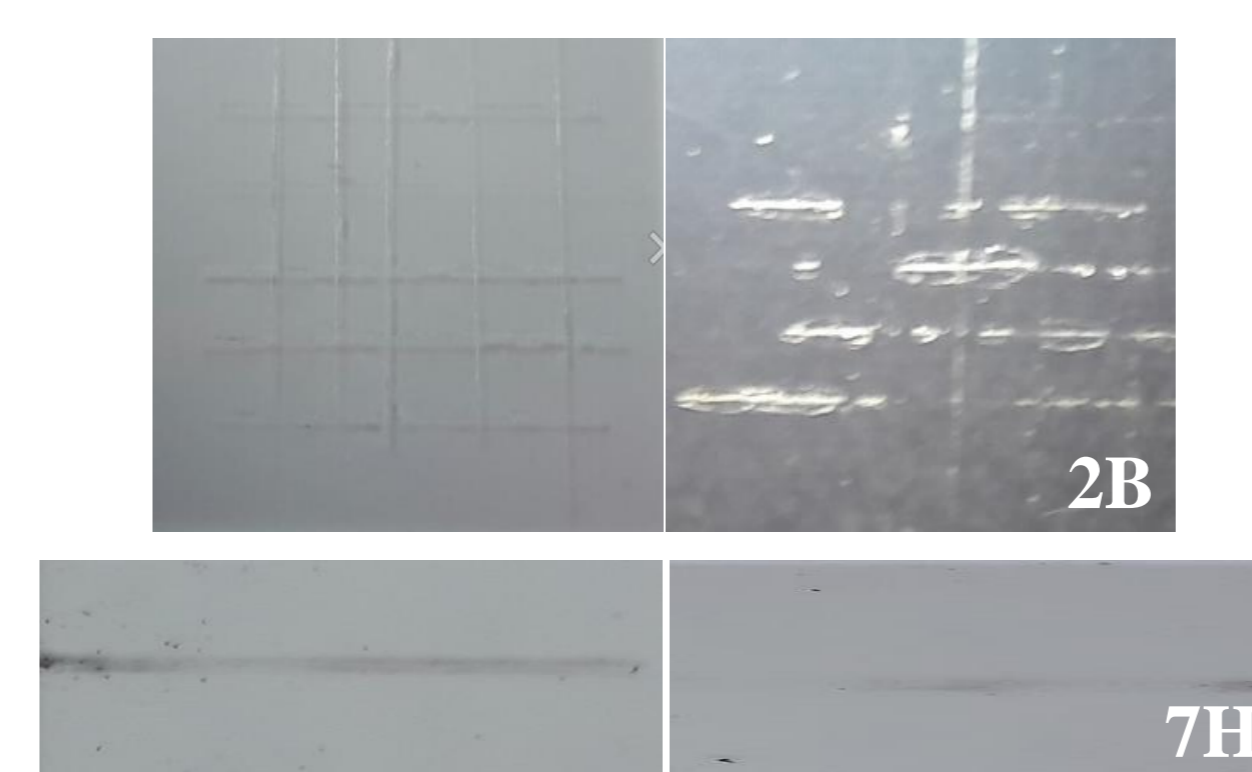

Room temperature

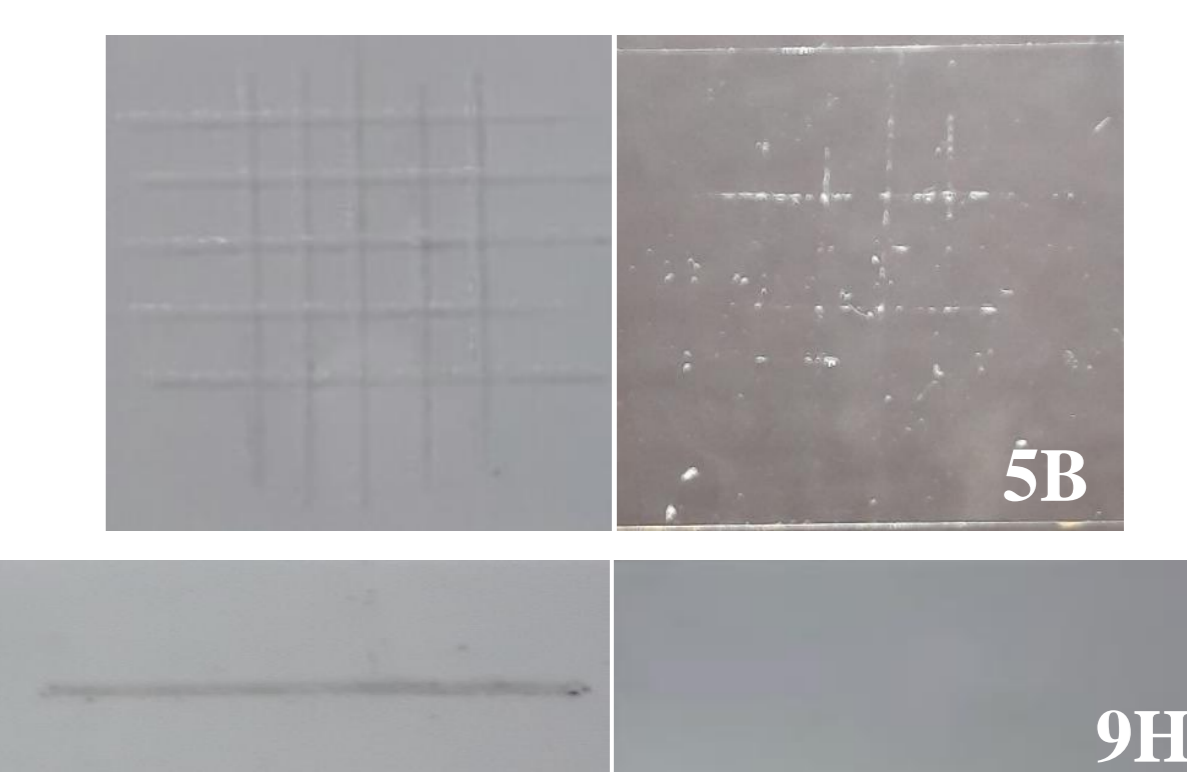

Anneal 1, Anneal 2 and Anneal 3

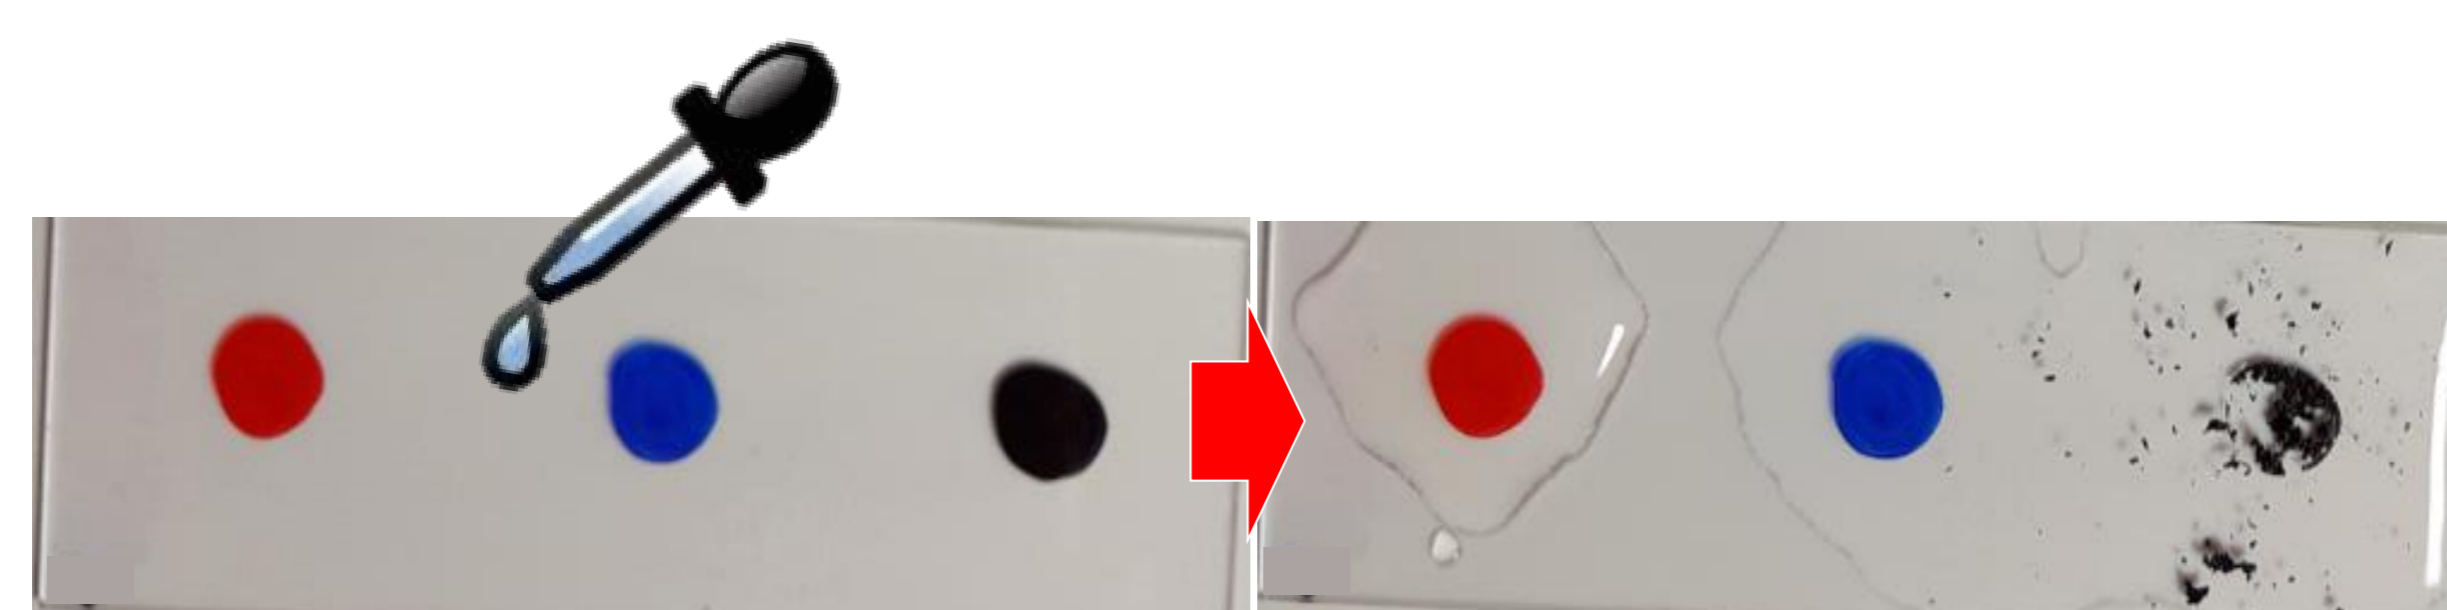

Dry at the room temperature (No annealing treatment)

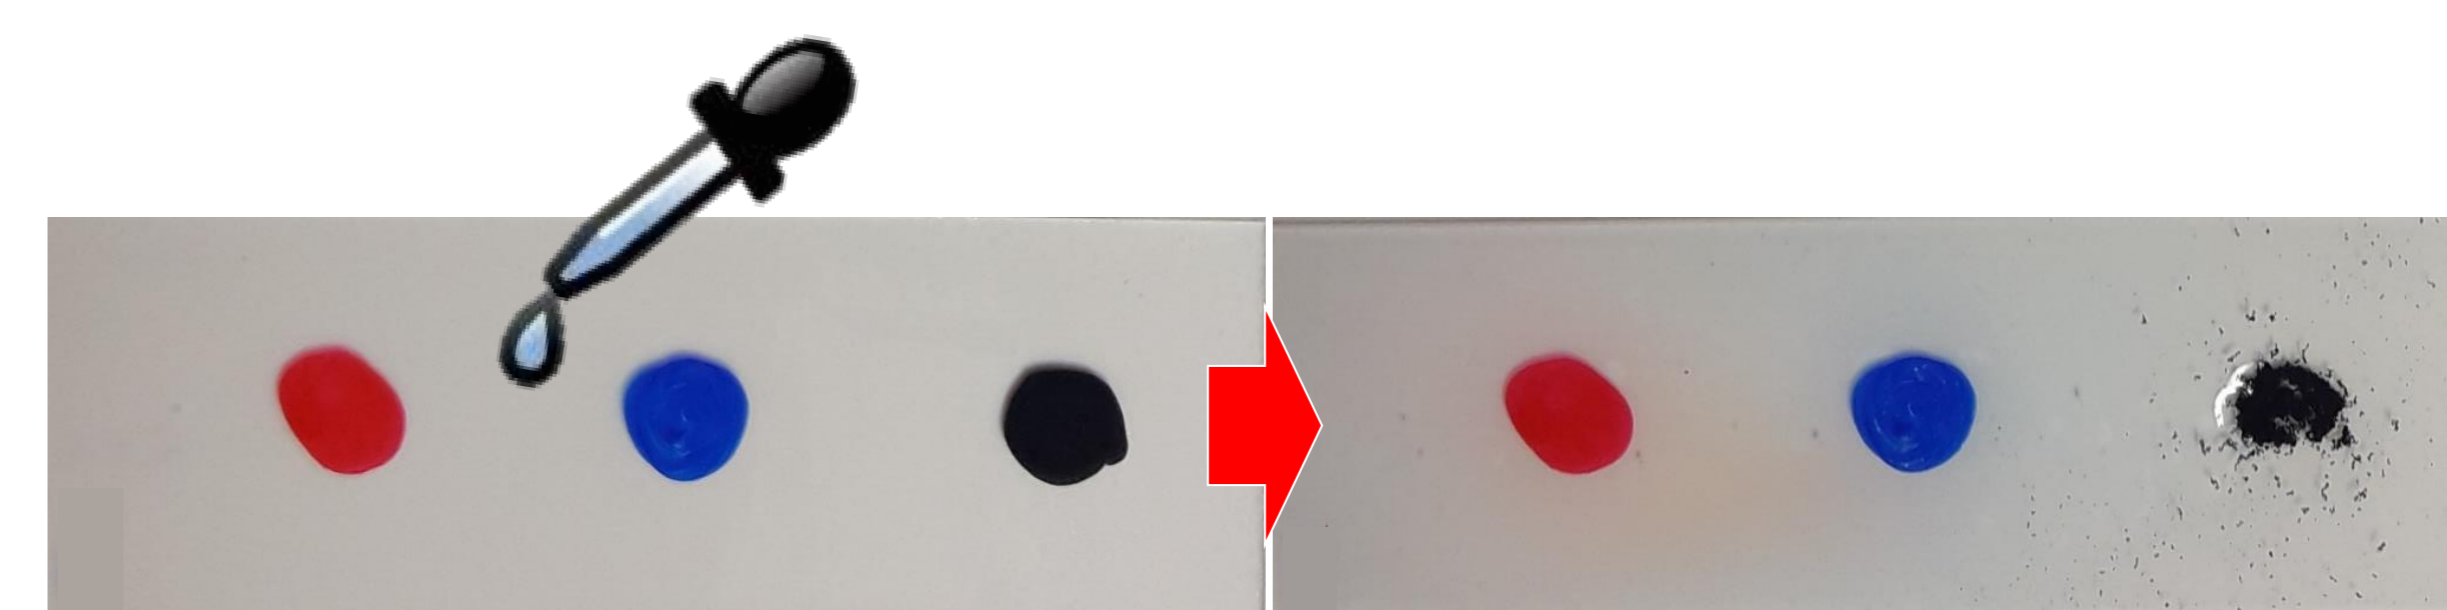

Anneal 1 (Annealing treatment proceeded once)

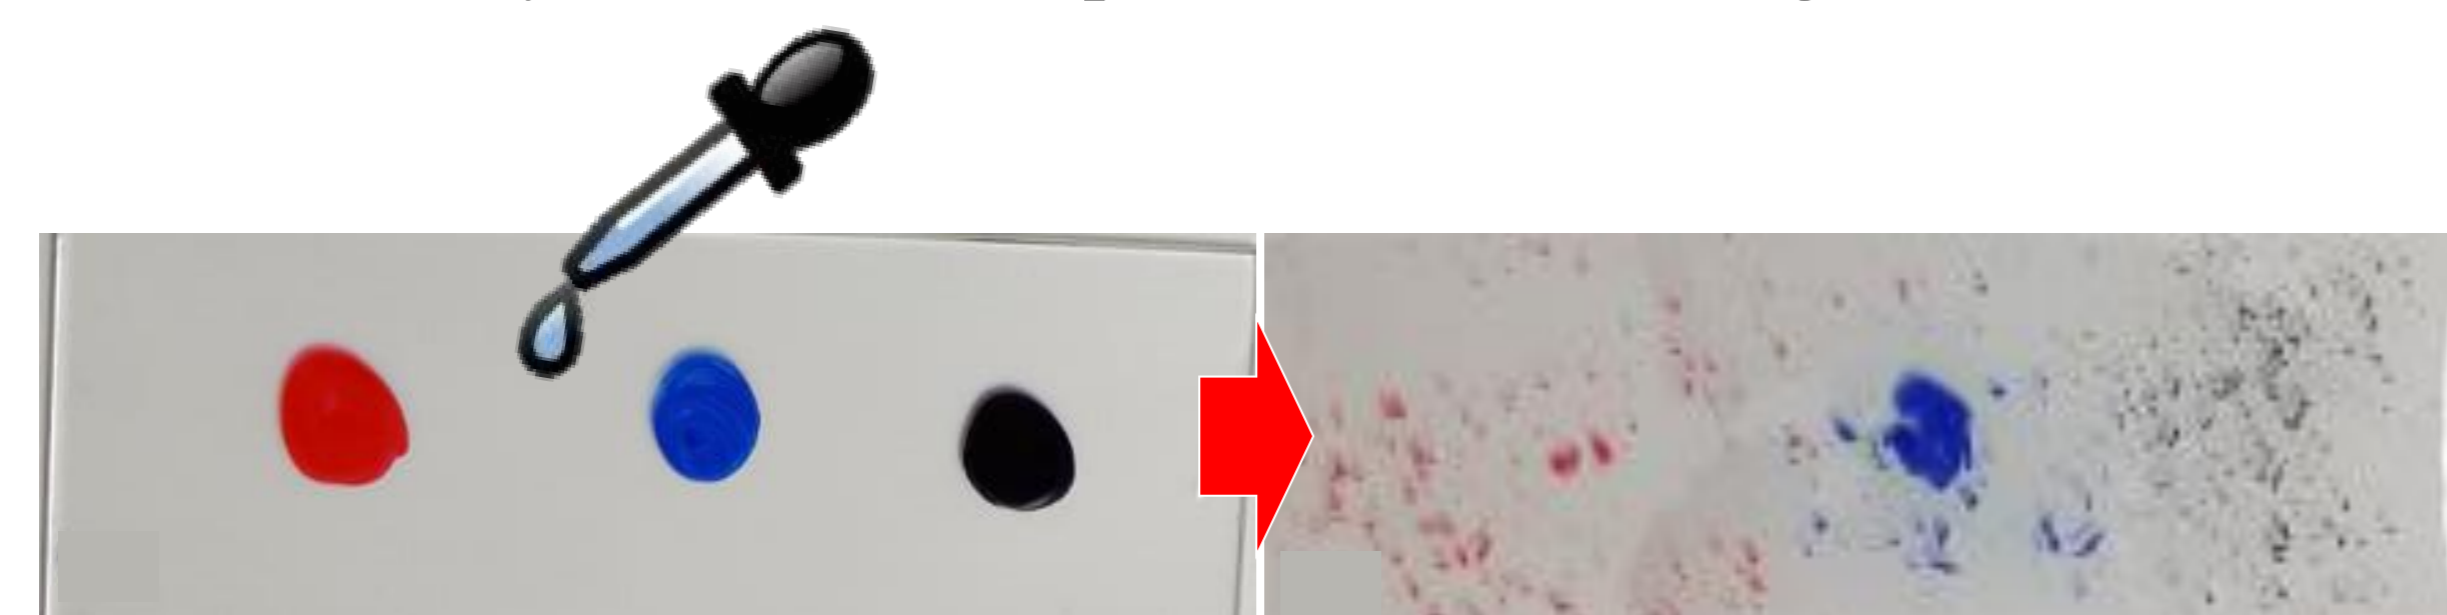

Anneal 2 (Annealing treatment proceeded twice)

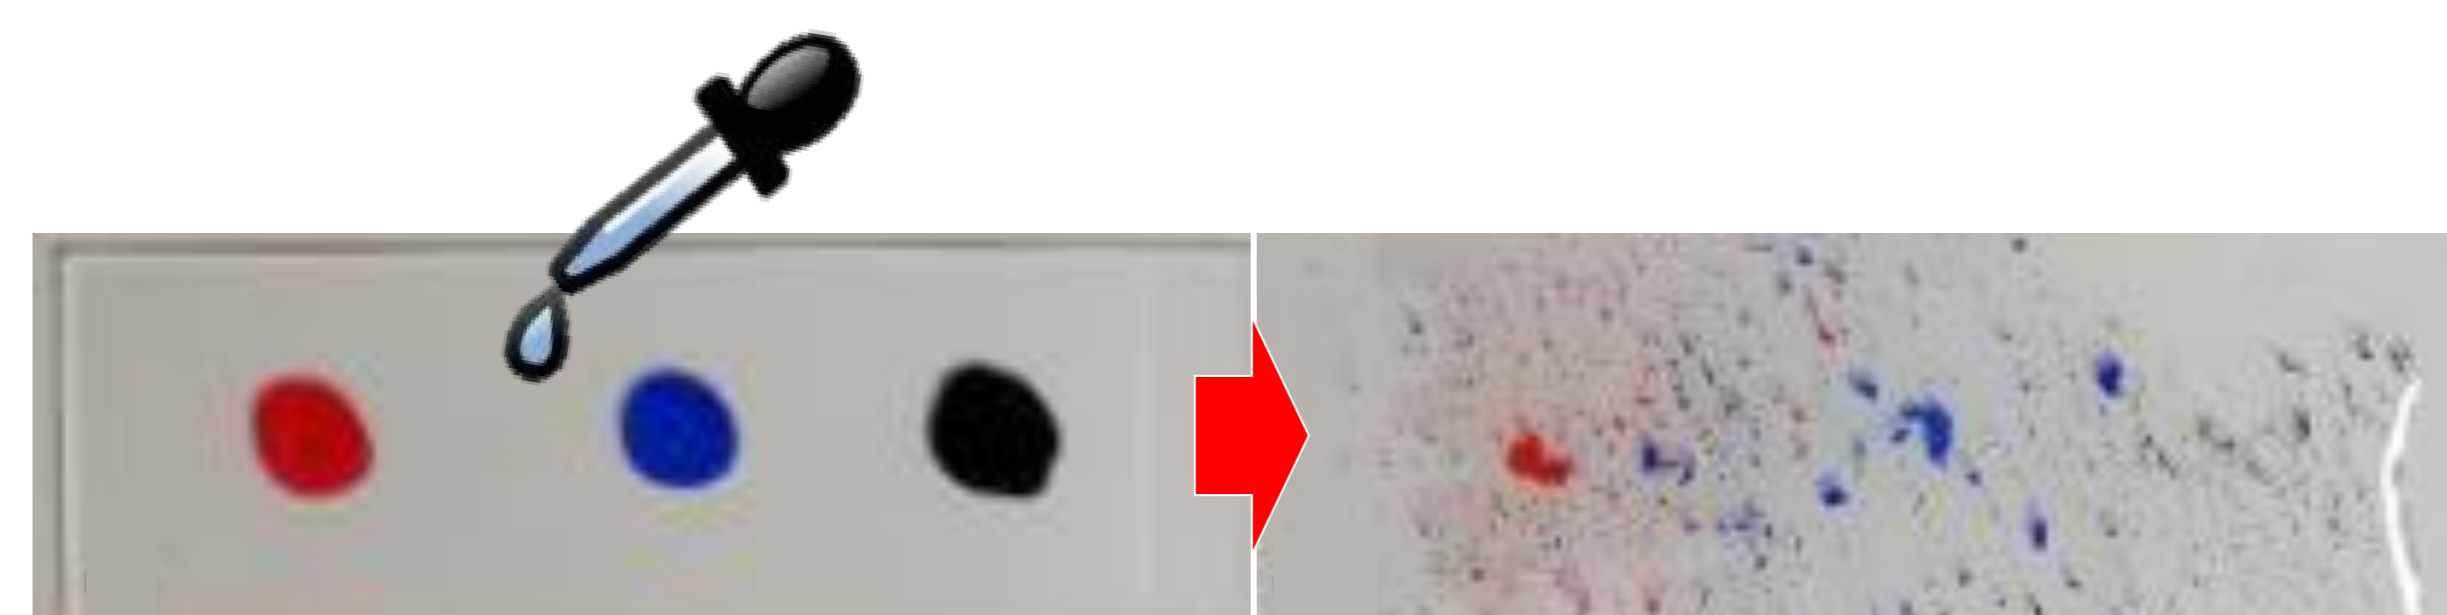

Anneal 3 (Annealing treatment proceeded third times)

## Conclusions

- This study was conducted to investigate the possibility of utilizing the technology that exhibits excellent anti-pollution characteristics in the field.
- When the annealing treatment was performed more than once, the transmittance was higher than 91%, and hardness and adhesion were found to be the highest grade.
- In the condition that the annealing treatment was repeated three times, the anti-pollution characteristic was the best.
- The technology presented in this study has advantages that it can be processed in the field and has excellent usability.
- The developed technology is expected to be utilized not only in the PV module but also in the field where the anti-pollution characteristic is required.
